# Supplementary material for: Features of Age-Related Macular Degeneration in the General Adults and Their Dependency on Age, Sex, and Smoking: Results from the German KORA Study
Source: PLOS journal article supplement (doi:10.1371/journal.pone.0167181), 2016-11-28
Supplement: S4 (10.1371/journal.pone.0167181.s004) [file journal.pone.0167181.s004.pdf › journal.pone.0167181.s004.pdf]

**S3 Table. Life style factors by 10-year age-groups separately for men and women.**

Shown are the proportions of subjects smoking, those adopting a healthy diet or pertaining a physically active life style in the 2,546 analysed subjects.

| Age groups (years)            | # analysed subjects with the variable available | All    | <30   | 30-39 | 40-49 | 50-59 | 60-69 | 70-75 |
|-------------------------------|-------------------------------------------------|--------|-------|-------|-------|-------|-------|-------|
| # subjects in analysed sample |                                                 | n=2546 | n=229 | n=644 | n=548 | n=517 | n=452 | n=156 |
| <b>Men</b>                    |                                                 |        |       |       |       |       |       |       |
| Current smoker versus other   | 1275                                            | 32.8%  | 40.4% | 49.4% | 36.1% | 28.7% | 16.5% | 10.3% |
| Ex-smoker versus other        | 1275                                            | 37.1%  | 20.2% | 21.9% | 35.3% | 41.9% | 52.4% | 62.1% |
| Ever smoking vs. never        | 1275                                            | 69.9%  | 60.6% | 71.3% | 71.4% | 70.6% | 68.8% | 72.4% |
| ≥5 pack year versus 0         | 1045                                            | 65.2%  | 50.0% | 64.5% | 67.3% | 67.9% | 65.7% | 67.1% |
| Physically active             | 1266                                            | 50.2%  | 66.1% | 53.4% | 54.0% | 46.7% | 44.7% | 32.2% |
| Healthy diet                  | 1266                                            | 48.4%  | 28.4% | 40.6% | 48.5% | 47.8% | 63.3% | 64.4% |
| <b>Women</b>                  |                                                 |        |       |       |       |       |       |       |
| Current smoker versus other   | 1267                                            | 25.1%  | 9.4%  | 36.8% | 24.8% | 19.2% | 8.2%  | 1.6%  |
| Ex-smoker versus other        | 1267                                            | 26.0%  | 25.8% | 22.3% | 31.2% | 28.7% | 23.6% | 21.7% |
| Ever smoking vs. never        | 1267                                            | 51.1%  | 50.8% | 57.5% | 59.2% | 53.7% | 35.5% | 29.0% |
| ≥5 pack year versus 0         | 1030                                            | 51.5%  | 33.3% | 47.1% | 50.0% | 48.1% | 27.6% | 19.0% |
| Physically active             | 1262                                            | 52.0%  | 50.0% | 56.5% | 54.6% | 46.5% | 50.5% | 47.1% |
| Healthy diet                  | 1262                                            | 64.6%  | 53.3% | 55.6% | 58.2% | 63.8% | 80.5% | 82.4% |

Current smokers are defined as regular smokers, currently smoking ≥ 1 cigarette per day, and occasional smokers, currently smoking < 1 cigarette per day.; ever smokers are defined as current or ex-smokers; pack years are defined as number of packs (20 cigarettes per pack) smoked per day times the number of years of smoking; physically active is defined as ≥ 1 hour of activity per week during leisure time in summer and winter; healthy diet is defined as a healthy diet score above the median of the analysed sample (median score = 15.00);
