# Supplementary material for: Features of Age-Related Macular Degeneration in the General Adults and Their Dependency on Age, Sex, and Smoking: Results from the German KORA Study
Source: PLOS journal article supplement (doi:10.1371/journal.pone.0167181), 2016-11-28
Supplement: S5 (10.1371/journal.pone.0167181.s005) [file journal.pone.0167181.s005.pdf › journal.pone.0167181.s005.pdf]

**S4 Table. General characteristics of the overall KORA-S4 participants compared to those analysed in this fundus sub-study.**

Shown are participant characteristics for the total study sample (n=4,261), for those subjects without any acquired fundus image (without image, n=1,472), for subjects without grading possible for each eye or with a competing retinal disease (n=243), and for those with gradable fundus image for each eye and no competing retinal disease (analysed subjects, n=2,546). Also shown is a P-value for difference between the analysed subjects and those subjects the un-gradable/with competing retinal disease and between the analysed and those without image computed as linear/logistic regression without and with adjusted for age and sex (where applicable).

|                                                       | n    | All                | Without image      | With image                                     |                    | P-value for difference                                         |                        |                               |                        |
|-------------------------------------------------------|------|--------------------|--------------------|------------------------------------------------|--------------------|----------------------------------------------------------------|------------------------|-------------------------------|------------------------|
|                                                       |      |                    |                    | Not gradable /<br>competing<br>retinal disease | Analysed           | Analysed vs.<br>not gradable /<br>competing retinal<br>disease |                        | Analysed vs.<br>without image |                        |
|                                                       |      |                    |                    |                                                |                    | Unadj.                                                         | Adj.                   | Unadj.                        | Adj.                   |
| Age [years], mean $\pm$ SD                            | 4261 | 49.18 $\pm$ 13.94  | 50.26 $\pm$ 14.00  | 60.48 $\pm$ 11.41                              | 47.48 $\pm$ 13.56  | 9.80*10 <sup>-46</sup>                                         | 5.84*10 <sup>-46</sup> | 7.56*10 <sup>-10</sup>        | 4.86*10 <sup>-10</sup> |
| Age $\geq$ 50 years, n (%)                            | 4261 | 2093 (49.12)       | 764 (51.90)        | 204 (83.95)                                    | 1125 (44.19)       | 6.11*10 <sup>-26</sup>                                         | 4.21*10 <sup>-26</sup> | 2.41*10 <sup>-6</sup>         | 1.69*10 <sup>-6</sup>  |
| Men, n (%)                                            | 4261 | 2090 (49.05)       | 700 (47.55)        | 112 (46.09)                                    | 1278 (50.20)       | 0.22                                                           | 0.11                   | 0.11                          | 0.06                   |
| <b>Lifestyle factors</b>                              |      |                    |                    |                                                |                    |                                                                |                        |                               |                        |
| Current smoker <sup>a</sup> , n (%)                   | 4256 | 1107 (26.01)       | 325 (22.09)        | 46 (18.93)                                     | 736 (28.95)        | 1.02*10 <sup>-3</sup>                                          | 0.74                   | 2.19*10 <sup>-6</sup>         | 7.76*10 <sup>-4</sup>  |
| Ex-smoker, n (%)                                      | 4256 | 1332 (31.30)       | 438 (29.78)        | 91 (37.45)                                     | 803 (31.59)        | 0.06                                                           | 0.96                   | 8.20*10 <sup>-4</sup>         | 1.39*10 <sup>-3</sup>  |
| Never smoker, n (%)                                   | 4256 | 1817 (42.70)       | 708 (48.13)        | 106 (43.62)                                    | 1003 (39.46)       | 0.21                                                           | 0.99                   | 9.05*10 <sup>-8</sup>         | 4.73*10 <sup>-6</sup>  |
| Pack years <sup>b</sup> , mean $\pm$ SD               | 4174 | 11.11 $\pm$ 18.37  | 10.45 $\pm$ 18.67  | 14.54 $\pm$ 21.71                              | 11.16 $\pm$ 17.81  | 5.79*10 <sup>-3</sup>                                          | 0.30                   | 0.24                          | 0.068                  |
| Physically active <sup>c</sup> , n (%)                | 4242 | 2064 (48.66)       | 666 (45.28)        | 107 (44.03)                                    | 1291 (51.07)       | 0.037                                                          | 0.55                   | 4.14*10 <sup>-4</sup>         | 4.36*10 <sup>-3</sup>  |
| Healthy diet <sup>d</sup> , n (%)                     | 4241 | 2412 (56.87)       | 833 (56.63)        | 167 (69.01)                                    | 1412 (55.85)       | 9.33*10 <sup>-5</sup>                                          | 0.26                   | 0.63                          | 0.29                   |
| <b>Metabolic parameters</b>                           |      |                    |                    |                                                |                    |                                                                |                        |                               |                        |
| BMI [kg/m <sup>2</sup> ] <sup>e</sup> , mean $\pm$ SD | 4224 | 27.22 $\pm$ 4.73   | 27.63 $\pm$ 4.72   | 28.44 $\pm$ 4.33                               | 26.87 $\pm$ 4.73   | 6.98*10 <sup>-7</sup>                                          | 0.34                   | 1.09*10 <sup>-6</sup>         | 1.28*10 <sup>-3</sup>  |
| T2DM <sup>f</sup> , n (%)                             | 4255 | 170 (4.00)         | 57 (3.88)          | 24 (9.88)                                      | 89 (3.50)          | 4.33*10 <sup>-6</sup>                                          | 0.07                   | 0.54                          | 0.62                   |
| Hypertension <sup>g</sup> , n (%)                     | 4243 | 1286 (30.31)       | 472 (32.11)        | 97 (40.08)                                     | 717 (28.33)        | 1.43*10 <sup>-4</sup>                                          | 0.76                   | 0.01                          | 0.35                   |
| HDL-C [mg/dl]                                         | 4214 | 57.71 $\pm$ 17.00  | 57.96 $\pm$ 17.10  | 57.20 $\pm$ 15.21                              | 57.62 $\pm$ 17.12  | 0.71                                                           | 0.41                   | 0.54                          | 0.95                   |
| LDL-C [mg/dl]                                         | 4209 | 137.47 $\pm$ 41.53 | 137.86 $\pm$ 39.84 | 149.86 $\pm$ 41.42                             | 136.07 $\pm$ 42.29 | 1.48*10 <sup>-6</sup>                                          | 0.65                   | 0.19                          | 0.50                   |

Abbreviations: SD = standard deviation; BMI = body-mass-index; T2DM = type 2 diabetes; HDL-C, LDL-C = high and low density lipoprotein cholesterol; unadj. = unadjusted; adj. = adjusted for age and sex if not indicated otherwise;

<sup>a)</sup> Current smokers are defined as regular smokers currently smoking  $\geq 1$  cigarette day, and occasional smokers, currently smoking  $< 1$  cigarette per day.

<sup>b)</sup> Pack years are defined as number of packs (20 cigarettes per pack) smoked per day times the number of years of smoking.

<sup>c)</sup> Physically active is defined as  $\geq 1$  hour of activity per week during leisure time in summer and winter.

<sup>d)</sup> Healthy diet is defined as a healthy diet score above the median of the analysed sample (median score = 15.00).

<sup>e)</sup> BMI is defined as measured weight divided by squared measured body height.

<sup>f)</sup> T2DM is defined as a self-reported diagnosis or anti-diabetes medication intake.

<sup>g)</sup> Hypertension is defined as actually measured systolic blood pressure of  $\geq 140$  mmHg, diastolic blood pressure of  $\geq 90$  mmHg or corresponding medication taken, given that the participants were aware of having hypertension.
