# Supplementary material for: Features of Age-Related Macular Degeneration in the General Adults and Their Dependency on Age, Sex, and Smoking: Results from the German KORA Study
Source: PLOS journal article supplement (doi:10.1371/journal.pone.0167181), 2016-11-28

**S3 Fig. AMD frequencies by sex and ten-year-age groups.**

Shown is the proportion of subjects with no AMD, early AMD separated for AREDS severity steps 2+3 and steps 4+, or late AMD by 10-year age-groups, for both, men and women.

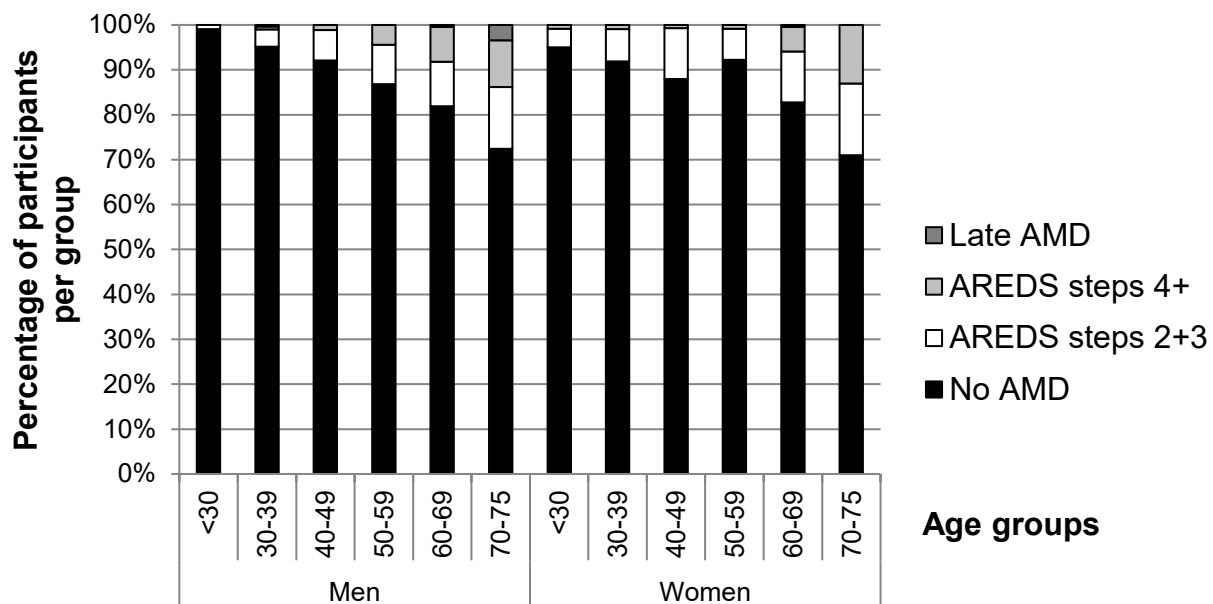

Supplement: S7 (10.1371/journal.pone.0167181.s007) [file journal.pone.0167181.s007.pdf › journal.pone.0167181.s007.pdf]
