# Supplementary material for: Features of Age-Related Macular Degeneration in the General Adults and Their Dependency on Age, Sex, and Smoking: Results from the German KORA Study
Source: PLOS journal article supplement (doi:10.1371/journal.pone.0167181), 2016-11-28
Supplement: S8 (10.1371/journal.pone.0167181.s008) [file journal.pone.0167181.s008.pdf › journal.pone.0167181.s008.pdf]

**S5 Table. Relative risk estimates of early/late AMD by sex and ten-year age-groups.**

Shown are the relative risk estimates (with the odds ratio estimates in parentheses) in the 2,546 analysed subjects (age group 50-59 as reference).

| Age groups (years)      | <30<br>n=229 | 30-39<br>n=644 | 40-49<br>n=548 | 50-59<br>n=517 | 60-69<br>n=452 | 70-75<br>n=156 |
|-------------------------|--------------|----------------|----------------|----------------|----------------|----------------|
| <b>Overall</b>          |              |                |                |                |                |                |
| Early AMD <sup>a</sup>  | 0.29 (0.26)  | 0.60 (0.57)    | 0.94 (0.94)    | Reference      | 1.62 (1.76)    | 2.47 (3.08)    |
| AREDS steps 2+3         | 0.33 (0.30)  | 0.70 (0.67)    | 1.15 (1.14)    | Reference      | 1.34 (1.45)    | 1.86 (2.31)    |
| AREDS steps 4+          | 0.16 (0.15)  | 0.29 (0.27)    | 0.34 (0.33)    | Reference      | 2.45 (2.66)    | 4.26 (5.30)    |
| Late AMD (GA and/or NV) | Reference    | Reference      | Reference      | Reference      | Reference      | 15.32 (19.21)  |
| <b>Men</b>              |              |                |                |                |                |                |
| Early AMD <sup>a</sup>  | 0.07 (0.06)  | 0.34 (0.31)    | 0.60 (0.56)    | Reference      | 1.34 (1.42)    | 1.83 (2.19)    |
| AREDS steps 2+3         | 0.10 (0.09)  | 0.44 (0.40)    | 0.77 (0.73)    | Reference      | 1.13 (1.20)    | 1.57 (1.88)    |
| AREDS steps 4+          | -            | 0.15 (0.13)    | 0.26 (0.24)    | Reference      | 1.77 (1.87)    | 2.35 (2.82)    |
| Late AMD (GA and/or NV) | Reference    | Reference      | Reference      | Reference      | Reference      | 20.53 (25.62)  |
| <b>Women</b>            |              |                |                |                |                |                |
| Early AMD <sup>a</sup>  | 0.64 (0.62)  | 1.04 (1.04)    | 1.55 (1.62)    | Reference      | 2.16 (2.41)    | 3.72 (4.83)    |
| AREDS steps 2+3         | 0.60 (0.58)  | 1.03 (1.04)    | 1.63 (1.71)    | Reference      | 1.63 (1.82)    | 2.29 (2.97)    |
| AREDS steps 4+          | 1.02 (0.99)  | 1.10 (1.10)    | 0.87 (0.91)    | Reference      | 6.65 (7.42)    | 15.91 (20.66)  |
| Late AMD (GA and/or NV) | Reference    | Reference      | Reference      | Reference      | Reference      | n. c.          |

Abbreviations: AREDS = Age-Related Eye Disease Study; GA = geographic atrophy; NV = neovascularisation; n. c = not calculable due to zero cases in age group;

<sup>a</sup>) Early AMD is defined as AREDS severity steps 2-9.
