# Supplementary material for: Features of Age-Related Macular Degeneration in the General Adults and Their Dependency on Age, Sex, and Smoking: Results from the German KORA Study
Source: PLOS journal article supplement (doi:10.1371/journal.pone.0167181), 2016-11-28
Supplement: S9 (10.1371/journal.pone.0167181.s009) [file journal.pone.0167181.s009.pdf › journal.pone.0167181.s009.pdf]

**S6 Table. Frequency of early AMD by severity steps and age-groups.**

Shown are the proportion of subjects with AREDS severity steps 1-9 and late AMD in the KORA-S4 fundus sub-study with gradable fundus images for each eye (n=2,546). Shown are the numbers and percentages of subjects in age-groups.

| <b>Age groups (years)</b>                    | <b>&lt;30</b> | <b>30-39</b> | <b>40-49</b> | <b>50-59</b> | <b>60-69</b> | <b>70-75</b> | <b>Total, n (%)</b> |
|----------------------------------------------|---------------|--------------|--------------|--------------|--------------|--------------|---------------------|
| <b>Participants, n (%)</b>                   | 229 (8.99)    | 644 (25.29)  | 548 (21.52)  | 517 (20.31)  | 452 (17.75)  | 156 (6.13)   | 2546 (100)          |
| <b>No AMD (AREDS severity step 1), n (%)</b> | 222 (96.94)   | 602 (93.48)  | 493 (89.96)  | 462 (89.36)  | 372 (82.30)  | 112 (71.79)  | 2263 (88.88)        |
| AREDS step 2, n (%)                          | 6 (2.62)      | 24 (3.73)    | 40 (7.30)    | 27 (5.22)    | 32 (7.08)    | 16 (10.26)   | 145 (5.70)          |
| AREDS step 3, n (%)                          | 0 (0)         | 12 (1.86)    | 10 (1.82)    | 14 (2.71)    | 16 (3.54)    | 7 (4.49)     | 59 (2.32)           |
| <b>AREDS severity steps 2+3, n (%)</b>       | 6 (2.62)      | 36 (5.59)    | 50 (9.12)    | 41 (7.93)    | 48 (10.62)   | 23 (14.74)   | 204 (8.01)          |
| AREDS step 4, n (%)                          | 1 (0.44)      | 5 (0.78)     | 4 (0.73)     | 9 (1.74)     | 19 (4.20)    | 8 (5.13)     | 46 (1.81)           |
| AREDS step 5, n (%)                          | 0 (0)         | 0 (0)        | 1 (0.18)     | 3 (0.58)     | 7 (1.55)     | 7 (4.49)     | 18 (0.71)           |
| AREDS step 6, n (%)                          | 0 (0)         | 0 (0)        | 0 (0)        | 2 (0.39)     | 2 (0.44)     | 3 (1.92)     | 7 (0.27)            |
| AREDS step 7, n (%)                          | 0 (0)         | 0 (0)        | 0 (0)        | 0 (0)        | 1 (0.22)     | 0 (0)        | 1 (0.04)            |
| AREDS step 8, n (%)                          | 0 (0)         | 0 (0)        | 0 (0)        | 0 (0)        | 0 (0)        | 0 (0)        | 0 (0)               |
| AREDS step 9, n (%)                          | 0 (0)         | 0 (0)        | 0 (0)        | 0 (0)        | 1 (0.22)     | 0 (0)        | 1 (0.04)            |
| <b>AREDS severity steps 4+, n (%)</b>        | 1 (0.44)      | 5 (0.78)     | 5 (0.91)     | 14 (2.71)    | 30 (6.64)    | 18 (11.54)   | 73 (2.87)           |
| <b>Late AMD (GA and/or NV), n (%)</b>        | 0 (0)         | 1 (0.16)     | 0 (0)        | 0 (0)        | 2 (0.44)     | 3 (1.92)     | 6 (0.24)            |

Abbreviations: AREDS = Age-Related Eye Disease Study; GA = geographic atrophy; NV = neovascularisation;
