# Supplementary material for: Features of Age-Related Macular Degeneration in the General Adults and Their Dependency on Age, Sex, and Smoking: Results from the German KORA Study
Source: PLOS journal article supplement (doi:10.1371/journal.pone.0167181), 2016-11-28
Supplement: S10 (10.1371/journal.pone.0167181.s010) [file journal.pone.0167181.s010.pdf › journal.pone.0167181.s010.pdf]

**S7 Table. AMD grading per eye.**

Shown are number of subjects by eye-specific AMD grading comparing the right and left eyes in the 2,546 analysed subjects. A total of 2,380 participants revealed the same AMD status in both eyes.

|            |                             | Left eyes      |                   |                | Total |
|------------|-----------------------------|----------------|-------------------|----------------|-------|
|            |                             | No AMD         | Early AMD         | Late AMD       |       |
|            |                             | (AREDS step 1) | (AREDS steps 2-9) | (GA and/or NV) |       |
| Right eyes | No AMD (AREDS step 1)       | 2263           | 82                | 0              | 2345  |
|            | Early AMD (AREDS steps 2-9) | 78             | 117               | 2              | 197   |
|            | Late AMD (GA and/or NV)     | 2              | 2                 | 0              | 4     |
|            | Total                       | 2343           | 201               | 2              | 2546  |

Abbreviations: AREDS = Age-Related Eye Disease Study; GA = geographic atrophy; NV = neovascularisation; Numbers of participants are given.
