# Supplementary material for: Features of Age-Related Macular Degeneration in the General Adults and Their Dependency on Age, Sex, and Smoking: Results from the German KORA Study
Source: PLOS journal article supplement (doi:10.1371/journal.pone.0167181), 2016-11-28

**S4 Fig. The age-trend or risk modelled separately for AREDS severity steps 2+3 and steps 4+ in men and women.**

Shown is the modeled trend of AMD risk (as log odds ratio) by years of age utilizing a thin plate regression spline for **A)** AREDS severity steps 2+3 risk in men (n cases = 90, n controls = 1,139), **B)** AREDS severity steps 2+3 risk in women (n cases = 114, n controls = 1,124), **C)** AREDS severity steps 4+ risk in men (n cases = 44, n controls = 1,139), and **D)** AREDS severity steps 4+ risk in women (n cases = 29, n controls = 1,124). Relative risk is given as log odds ratio with persons at the age of 50 as reference and 95% confidence interval shaded in grey. These relationships are derived by modeling the respective outcome with sex as covariate and a sex-specific thin plate regression spline for age.

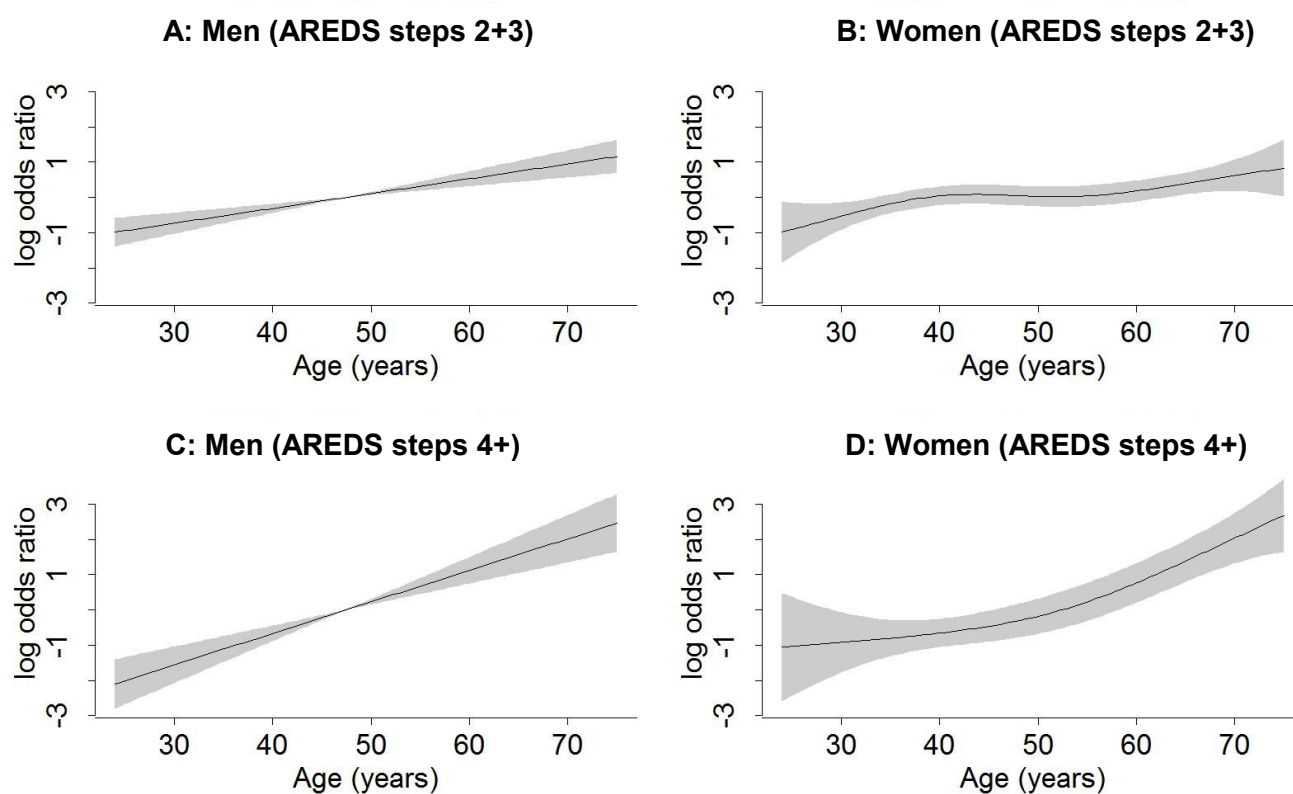

Supplement: S11 (10.1371/journal.pone.0167181.s011) [file journal.pone.0167181.s011.pdf › journal.pone.0167181.s011.pdf]
