# Supplementary material for: Features of Age-Related Macular Degeneration in the General Adults and Their Dependency on Age, Sex, and Smoking: Results from the German KORA Study
Source: PLOS journal article supplement (doi:10.1371/journal.pone.0167181), 2016-11-28
Supplement: S13 (10.1371/journal.pone.0167181.s013) [file journal.pone.0167181.s013.pdf › journal.pone.0167181.s013.pdf]

**S8 Table. An accounting of the age-trend of early AMD risk.**

Shown are odds ratios (OR) per year and P-values from logistic regression models. All models include sex, age (linear or non-linear), and an interaction sex x age. The models adding PY also include an interaction sex x PY. The life style factors are healthy diet and physical activity; the metabolic factors are BMI, T2D, hypertension, HDL- and LDL-cholesterol (same models as in **Tables 3 and 4**). The outcome is early AMD versus AMD-free, AREDS severity steps 4+ versus AMD-free, or AREDS severity steps 2+3 versus AMD-free.

| Model                        | Age linear     |                |                               | Age non-linear <sup>b</sup> |          |
|------------------------------|----------------|----------------|-------------------------------|-----------------------------|----------|
|                              | OR men (P)     | OR women (P)   | P sex difference <sup>a</sup> | df men                      | df women |
| <b>Early AMD<sup>c</sup></b> |                |                |                               |                             |          |
| age, sex                     | 1.057 (<0.001) | 1.035 (<0.001) | 0.0344                        | 1.001                       | 3.283    |
| + PY                         | 1.057 (<0.001) | 1.033 (<0.001) | 0.0281                        | 1.000                       | 3.272    |
| + PY, life style factors     | 1.056 (<0.001) | 1.032 (<0.001) | 0.0242                        | 1.000                       | 3.276    |
| + PY, metabolic factors      | 1.055 (<0.001) | 1.034 (<0.001) | 0.0606                        | 1.000                       | 3.228    |
| <b>AREDS steps 4+</b>        |                |                |                               |                             |          |
| age, sex                     | 1.093 (<0.001) | 1.090 (<0.001) | 0.8931                        | 1.001                       | 1.975    |
| + PY                         | 1.093 (<0.001) | 1.085 (<0.001) | 0.7507                        | 1.001                       | 1.796    |
| + PY, life style factors     | 1.093 (<0.001) | 1.084 (<0.001) | 0.7156                        | 1.001                       | 1.811    |
| + PY, metabolic factors      | 1.092 (<0.001) | 1.090 (<0.001) | 0.9416                        | 1.001                       | 1.906    |
| <b>AREDS steps 2+3</b>       |                |                |                               |                             |          |
| age, sex                     | 1.043 (<0.001) | 1.023 (0.002)  | 0.0929                        | 1.003                       | 2.917    |
| + PY                         | 1.044 (<0.001) | 1.022 (0.003)  | 0.0589                        | 1.002                       | 2.831    |
| + PY, life style factors     | 1.043 (<0.001) | 1.020 (0.008)  | 0.0543                        | 1.002                       | 2.804    |
| + PY, metabolic factors      | 1.041 (<0.001) | 1.021 (0.010)  | 0.1053                        | 1.002                       | 2.750    |

Abbreviations: PY = pack year; df = degrees of freedom with df ~ 1 indicating a linear relationship; AREDS = Age-Related Eye Disease Study;

<sup>a</sup>) P-value for the interaction of age and sex.

<sup>b</sup>) Using a thin plate regression spline.

<sup>c</sup>) Early AMD is defined as AREDS severity steps 2-9.
