# Supplementary material for: Features of Age-Related Macular Degeneration in the General Adults and Their Dependency on Age, Sex, and Smoking: Results from the German KORA Study
Source: PLOS journal article supplement (doi:10.1371/journal.pone.0167181), 2016-11-28
Supplement: S14 (10.1371/journal.pone.0167181.s014) [file journal.pone.0167181.s014.pdf › journal.pone.0167181.s014.pdf]

**S9 Table. Early AMD grading results comparing three grading systems.**

Shown are the number of subjects of 10% of the KORA study participants (n=278) in a pairwise comparison by early AMD status using three grading systems: the AREDS 9-step severity scale [1], the Clinical Classification [2], and the Three Continent AMD Consortium severity scale [3]. **A)** Comparing the AREDS 9-step severity scale to the Three Continent AMD Consortium severity scale. **B)** Comparing the AREDS 9-step severity scale to the Clinical Classification. **C)** Comparing the Three Continent AMD Consortium severity scale to the Clinical Classification.

| <b>A</b>                           |                             | <b>Three Continent AMD Consortium severity scale</b> |                        | Total |
|------------------------------------|-----------------------------|------------------------------------------------------|------------------------|-------|
|                                    |                             | No AMD                                               | Early AMD <sup>a</sup> |       |
| <b>AREDS 9-step severity scale</b> | No AMD (AREDS step 1)       | 253                                                  | 3                      | 256   |
|                                    | Early AMD (AREDS steps 2-9) | 7                                                    | 15                     | 22    |
| Total                              |                             | 260                                                  | 18                     | 278   |

Abbreviations: AREDS = Age-Related Eye Disease Study;

<sup>a)</sup> Early AMD is defined as “mild early”+“moderate early”+“severe early” AMD following guidelines.[3]

| <b>B</b>                           |                             | <b>Clinical Classification</b> |                        | Total |
|------------------------------------|-----------------------------|--------------------------------|------------------------|-------|
|                                    |                             | No AMD <sup>a</sup>            | Early AMD <sup>b</sup> |       |
| <b>AREDS 9-step severity scale</b> | No AMD (AREDS step 1)       | 220                            | 36                     | 256   |
|                                    | Early AMD (AREDS steps 2-9) | 5                              | 17                     | 22    |
| Total                              |                             | 225                            | 53                     | 278   |

Abbreviations: AREDS = Age-Related Eye Disease Study;

<sup>a)</sup> No AMD is defined as “no apparent aging changes”+“normal aging changes” following guidelines.[2]

<sup>b)</sup> Early AMD is defined as “early”+“intermediate” AMD according to guidelines.[2]

| <b>C</b>                                             |                        | <b>Clinical Classification</b> |                        | Total |
|------------------------------------------------------|------------------------|--------------------------------|------------------------|-------|
|                                                      |                        | No AMD <sup>a</sup>            | Early AMD <sup>b</sup> |       |
| <b>Three Continent AMD Consortium severity scale</b> | No AMD                 | 225                            | 35                     | 260   |
|                                                      | Early AMD <sup>c</sup> | 0                              | 18                     | 18    |
| Total                                                |                        | 225                            | 53                     | 278   |

<sup>a)</sup> No AMD is defined as “no apparent aging changes”+“normal aging changes” following guidelines.[2]

<sup>b)</sup> Early AMD is defined as “early”+“intermediate” AMD according to guidelines.[2]

<sup>c)</sup> Early AMD is defined as “mild early”+“moderate early”+“severe early” AMD following guidelines.[3]

## References

1. Davis MD, Gangnon RE, Lee LY, Hubbard LD, Klein BE, Klein R, et al. The Age-Related Eye Disease Study severity scale for age-related macular degeneration: AREDS Report No. 17. *ArchOphthalmol*. 2005;123(11):1484-98.
2. Ferris FL, III, Wilkinson CP, Bird A, Chakravarthy U, Chew E, Csaky K, et al. Clinical classification of age-related macular degeneration. *Ophthalmology*. 2013;120(4):844-51. doi: S0161-6420(12)01055-X [pii];10.1016/j.opthta.2012.10.036 [doi].
3. Klein R, Meuer SM, Myers CE, Buitendijk GH, Rochtchina E, Choudhury F, et al. Harmonizing the classification of age-related macular degeneration in the three-continent AMD consortium. *Ophthalmic Epidemiol*. 2014;21(1):14-23. doi: 10.3109/09286586.2013.867512 [doi].
