# Supplementary material for: Features of Age-Related Macular Degeneration in the General Adults and Their Dependency on Age, Sex, and Smoking: Results from the German KORA Study
Source: PLOS journal article supplement (doi:10.1371/journal.pone.0167181), 2016-11-28
Supplement: S15 (10.1371/journal.pone.0167181.s015) [file journal.pone.0167181.s015.pdf › journal.pone.0167181.s015.pdf]

**S10 Table. AMD prevalence in our KORA-S4 fundus sub-study in the context of previously published population-based studies.**

Shown are prevalence estimates from population-based cross-sectional studies of European ancestry sorted by number of participants. For comparison to non-European ancestry, meta-analysis data from Asia including 9 studies from 4 Asian populations [1] is added.

| Study name<br>(Location)                                                                | #<br>subjects     | Age<br>[years] | Grading scheme for<br>early AMD                                                          | Definition of early AMD                                                                                                                                                                                                                                                                   | Early<br>AMD<br>[%] | Late<br>AMD<br>(GA/NV)<br>[%] | References                                                  |
|-----------------------------------------------------------------------------------------|-------------------|----------------|------------------------------------------------------------------------------------------|-------------------------------------------------------------------------------------------------------------------------------------------------------------------------------------------------------------------------------------------------------------------------------------------|---------------------|-------------------------------|-------------------------------------------------------------|
| <b>Meta-analysis Asia</b>                                                               | 10919             | 40-79          | WARMGS [2]<br>or<br>International<br>Classification and<br>Grading System for AMD<br>[3] | Soft indistinct or reticular drusen; or any<br>drusen type except hard indistinct drusen<br>with pigmentary abnormalities<br>or<br>Soft drusen $\geq 63 \mu\text{m}$ , hyperpigmentation<br>and/or hypopigmentation of the retinal<br>pigment epithelium (RPE)                            | 6.8                 | 0.6                           | Kawasaki et<br>al., 2010 [1]                                |
| <b>Rotterdam Study (RS)<sup>a</sup></b><br>(Netherlands)                                |                   |                |                                                                                          |                                                                                                                                                                                                                                                                                           |                     |                               |                                                             |
| Before harmonization                                                                    | 6251 <sup>b</sup> | 55-98          | Rotterdam Study<br>classification [4]                                                    | Soft, distinct ( $\geq 63 \mu\text{m}$ ) or indistinct ( $\geq 125 \mu\text{m}$ ) or reticular drusen with/without<br>pigmentary abnormalities                                                                                                                                            | 7.6                 | 1.6                           | Vingerling et<br>al., 1995 [5]<br>Klein et al.,<br>2014 [6] |
| After harmonization                                                                     | 6251 <sup>b</sup> | 55-98          | Three Continent AMD<br>Consortium severity<br>scale [6]                                  | Small - intermediate drusen ( $< 125 \mu\text{m}$ )<br>with pigmentary abnormalities; or large<br>drusen ( $\geq 125 \mu\text{m}$ ) with/without drusen<br>area $\geq 331.820 \mu\text{m}^2$ with/without<br>pigmentary abnormalities                                                     | 17.4                | 1.6                           | Klein et al.,<br>2014 [6]                                   |
| <b>Age, Gene/Environment<br/>Susceptibility (AGES)<br/>Reykjavik Study</b><br>(Iceland) | 5272 <sup>b</sup> | $\geq 66$      | Modified after WARMGS<br>[2]                                                             | Soft drusen (distinct or indistinct, $\geq 63$ –<br>300 $\mu\text{m}$ ) with pigmentary abnormalities; or<br>large soft drusen ( $\geq 125 \mu\text{m}$ ) with a large<br>drusen area ( $> 500 \mu\text{m}$ diameter-circle); or<br>large soft instinct drusen ( $\geq 125 \mu\text{m}$ ) | 21.3                | 5.3                           | Jonasson et<br>al., 2011 [7]                                |

**Beaver Dam Eye Study (BDES)<sup>a</sup> (USA)**

|                                                                                                      |                   |       |                                                                                |                                                                                                                                                                                         |      |     |                                                      |
|------------------------------------------------------------------------------------------------------|-------------------|-------|--------------------------------------------------------------------------------|-----------------------------------------------------------------------------------------------------------------------------------------------------------------------------------------|------|-----|------------------------------------------------------|
| Before harmonization                                                                                 | 4771 <sup>b</sup> | 43-86 | WARMGS [2]                                                                     | Soft indistinct or reticular drusen; or any drusen type except hard indistinct drusen with pigmentary abnormalities                                                                     | 18.7 | 1.8 | Klein et al., 1992 [8]<br>Klein et al., 2014 [6]     |
| After harmonization                                                                                  | 4771 <sup>b</sup> | 43-86 | Three Continent AMD Consortium severity scale [6]                              | Small - intermediate drusen (<125 µm) with pigmentary abnormalities; or large drusen (≥125 µm) with/without drusen area ≥ 331.820 µm <sup>2</sup> with/without pigmentary abnormalities | 20.3 | 1.8 | Klein et al., 2014 [6]                               |
| <b>European Eye Study (EUREYE) (Norway, Estonia, Northern Ireland, France, Italy, Greece, Spain)</b> |                   |       |                                                                                |                                                                                                                                                                                         |      |     |                                                      |
|                                                                                                      | 4753 <sup>b</sup> | ≥65   | Rotterdam Study classification [4]                                             | Soft, distinct (≥63 µm) or indistinct (≥125 µm) or reticular drusen with/without pigmentary abnormalities                                                                               | 15.4 | 3.3 | Augood et al., 2006 [9]                              |
| <b>The Irish Longitudinal study on Ageing (TILDA) (Republic of Ireland)</b>                          |                   |       |                                                                                |                                                                                                                                                                                         |      |     |                                                      |
|                                                                                                      | 4751 <sup>b</sup> | ≥ 50  | Modified after the International Classification and Grading System for AMD [3] | >10 hard drusen (<63 µm) and/or presence of soft drusen (>125 µm)                                                                                                                       | 6.1  | 0.4 | Akuffo et al., 2015 [10]                             |
| <b>Gutenberg Health Study (GHS) (Mainz, Germany)</b>                                                 |                   |       |                                                                                |                                                                                                                                                                                         |      |     |                                                      |
|                                                                                                      | 4340 <sup>b</sup> | 35-74 | Modified after the Rotterdam Study classification [4]                          | Soft, distinct (≥63 µm) or indistinct (≥125 µm) or reticular drusen with/without pigmentary abnormalities                                                                               | 11.9 | 0.2 | Korb et al., 2014 [11]                               |
| <b>Blue Mountains Eye Study (BMES)<sup>a</sup> (Australia)</b>                                       |                   |       |                                                                                |                                                                                                                                                                                         |      |     |                                                      |
| Before harmonization                                                                                 | 3583 <sup>b</sup> | ≥49   | WARMGS [2]                                                                     | Soft indistinct or reticular drusen; or soft distinct drusen with pigmentary abnormalities                                                                                              | 4.0  | 1.8 | Mitchell et al., 1995 [12]<br>Klein et al., 2014 [6] |
| After harmonization                                                                                  | 3583 <sup>b</sup> | ≥49   | Three Continent AMD Consortium severity scale [6]                              | Small - intermediate drusen (<125 µm) with pigmentary abnormalities; or large drusen (≥125 µm) with/without drusen area ≥ 331.820 µm <sup>2</sup> with/without pigmentary abnormalities | 12.8 | 1.8 | Klein et al., 2014 [6]                               |

|                                                             |                   |       |                                                                                            |                                                                                      |      |     |                           |
|-------------------------------------------------------------|-------------------|-------|--------------------------------------------------------------------------------------------|--------------------------------------------------------------------------------------|------|-----|---------------------------|
| <b>Tromsø Eye Study (TES)</b><br>(Norway)                   | 2631 <sup>b</sup> | 65–87 | Modified after the<br>International<br>Classification and<br>Grading System for<br>AMD [3] | Large drusen >125 µm                                                                 | 24.1 | 3.5 | Erke et al.,<br>2014 [13] |
| <b>KORA-S4 fundus sub-<br/>study</b><br>(Augsburg, Germany) | 2546 <sup>c</sup> | 25-74 | AREDS 9-step severity<br>scale [14]                                                        | AREDS Severity Steps 2-9 (drusen area ≥<br>C-1 with/without pigmentary abnormalities | 11.4 | 0.2 | Present<br>manuscript     |

Abbreviations: WARMGS = Wisconsin age-related maculopathy grading system; AREDS = Age-Related Eye Disease Study; C-1 = central standard circle as defined by AREDS report no. 17 [14] (also shown in S1 Fig A);

<sup>a</sup>) Prevalence is adjusted for age and sex.

<sup>b</sup>) Images were acquired for each eye with at least one eye being gradable, the more severe eye was used to classify the person.

<sup>c</sup>) Images were acquired for each eye with each eye being gradable, the more severe eye was used to classify the person.

## References

1. Kawasaki R, Yasuda M, Song SJ, Chen SJ, Jonas JB, Wang JJ, et al. The prevalence of age-related macular degeneration in Asians: a systematic review and meta-analysis. *Ophthalmology*. 2010;117(5):921-7. doi: 10.1016/j.ophtha.2009.10.007. PubMed PMID: 20110127.
2. Klein R, Davis MD, Magli YL, Segal P, Klein BE, Hubbard L. The Wisconsin age-related maculopathy grading system. *Ophthalmology*. 1991;98(7):1128-34. PubMed PMID: 1843453.
3. Bird AC, Bressler NM, Bressler SB, Chisholm IH, Coscas G, Davis MD, et al. An international classification and grading system for age-related maculopathy and age-related macular degeneration. The International ARM Epidemiological Study Group. *Survey of ophthalmology*. 1995;39(5):367-74. PubMed PMID: 7604360.
4. Klaver CC, Assink JJ, van Leeuwen R, Wolfs RC, Vingerling JR, Stijnen T, et al. Incidence and progression rates of age-related maculopathy: the Rotterdam Study. *Investigative ophthalmology & visual science*. 2001;42(10):2237-41. PubMed PMID: 11527936.
5. Vingerling JR, Dielemans I, Hofman A, Grobbee DE, Hijmering M, Kramer CF, et al. The prevalence of age-related maculopathy in the Rotterdam Study. *Ophthalmology*. 1995;102(2):205-10. PubMed PMID: 7862408.
6. Klein R, Meuer SM, Myers CE, Buitendijk GH, Rochtchina E, Choudhury F, et al. Harmonizing the classification of age-related macular degeneration in the three-continent AMD consortium. *Ophthalmic Epidemiol*. 2014;21(1):14-23. doi: 10.3109/09286586.2013.867512 [doi].
7. Jonasson F, Arnarsson A, Eiriksdottir G, Harris TB, Launer LJ, Meuer SM, et al. Prevalence of age-related macular degeneration in old persons: Age, Gene/environment Susceptibility Reykjavik Study. *Ophthalmology*. 2011;118(5):825-30. doi: S0161-6420(10)00931-0 [pii];10.1016/j.ophtha.2010.08.044 [doi].
8. Klein R, Klein BE, Linton KL. Prevalence of age-related maculopathy. The Beaver Dam Eye Study. *Ophthalmology*. 1992;99(6):933-43. PubMed PMID: 1630784.

9. Augood CA, Vingerling JR, de Jong PT, Chakravarthy U, Seland J, Soubrane G, et al. Prevalence of age-related maculopathy in older Europeans: the European Eye Study (EUREYE). *ArchOphthalmol*. 2006;124(4):529-35.
10. Akuffo KO, Nolan J, Stack J, Moran R, Feeney J, Kenny RA, et al. Prevalence of age-related macular degeneration in the Republic of Ireland. *The British journal of ophthalmology*. 2015;99(8):1037-44. doi: 10.1136/bjophthalmol-2014-305768. PubMed PMID: 25712825; PubMed Central PMCID: PMC4518752.
11. Korb CA, Kottler UB, Wolfram C, Hoehn R, Schulz A, Zwiener I, et al. Prevalence of age-related macular degeneration in a large European cohort: Results from the population-based Gutenberg Health Study. *Graefes ArchClinExpOphthalmol*. 2014.
12. Mitchell P, Smith W, Attebo K, Wang JJ. Prevalence of age-related maculopathy in Australia. The Blue Mountains Eye Study. *Ophthalmology*. 1995;102(10):1450-60. PubMed PMID: 9097791.
13. Erke MG, Bertelsen G, Peto T, Sjolie AK, Lindekleiv H, Njolstad I. Cardiovascular risk factors associated with age-related macular degeneration: the Tromso Study. *Acta ophthalmologica*. 2014;92(7):662-9. doi: 10.1111/aos.12346. PubMed PMID: 24460653.
14. Davis MD, Gangnon RE, Lee LY, Hubbard LD, Klein BE, Klein R, et al. The Age-Related Eye Disease Study severity scale for age-related macular degeneration: AREDS Report No. 17. *ArchOphthalmol*. 2005;123(11):1484-98.
